# Supplementary material
Source: PubMed Central journal article supplement (PMC2405912)
Supplement: NIHMS46695-supplement-01.pdf [file NIHMS46695-supplement-01.pdf]

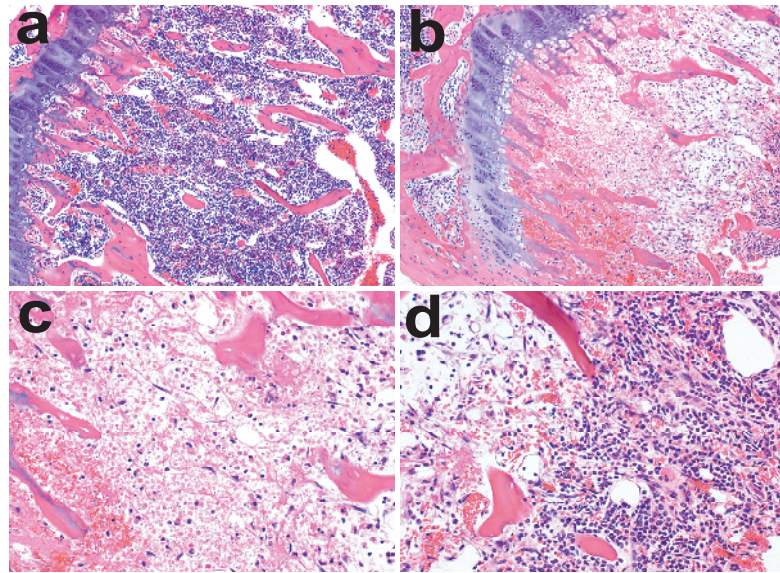

**Supplementary Figure 1.** Toxicity of the engineered PrAg proteins. Representative microscopic appearance of the bone and bone marrow (femur) at day 7 after treatment of the mice with PBS (**a**) or PrAg-U2-R200A/PrAg-L1-I210A (**b-d**) (45/22.5  $\mu$ g, in the presence of 3  $\mu$ g FP59) at day 0, 3, and 6. The bone marrow necrosis was observed in toxin-treated mice (**b**, H&E, 64 $\times$ ) but not in the mock-treated mice (**a**, H&E, 64 $\times$ ). At higher magnification, the necrotic area shows cellular debris and necrotic bone trabeculae (**c**); fibroblastic and vascular proliferations are seen in the periphery of damaged area representing ongoing repair processes (**d**).

**Supplementary Table 1. Properties and maximum tolerated doses of the PrAg proteins when injected intraperitoneally at days 0, 3, and 6**

| PrAg proteins or their combination | Proteolytic cleavage | Group L mutation<br>Subsite II | Group R mutation |             | MTD3 ( $\mu$ g)<br>FP59=3 $\mu$ g |
|------------------------------------|----------------------|--------------------------------|------------------|-------------|-----------------------------------|
|                                    |                      |                                | Subsite I        | Subsite III |                                   |
| PrAg                               | Furin                |                                |                  |             | 0.25                              |
| PrAg-R200A                         | Furin                | R200A                          |                  |             | ND                                |
| PrAg-I210A                         | Furin                |                                |                  | I210A       | ND                                |
| PrAg-L1                            | MMP                  |                                |                  |             | 4                                 |
| PrAg-L1-R178A                      | MMP                  |                                | R178A            |             | ND                                |
| PrAg-L1-I210A                      | MMP                  |                                |                  | I210A       | 50                                |
| PrAg-L1-K214A                      | MMP                  |                                |                  | K214A       | $\geq 50$                         |
| PrAg-U2                            | uPA                  |                                |                  |             | 10                                |
| PrAg-U2-K197A                      | uPA                  | K197A                          |                  |             | ND                                |
| PrAg-U2-R200A                      | uPA                  | R200A                          |                  |             | $\geq 100$                        |
| PrAg-U2-R200A                      | uPA                  | R200A                          |                  |             | 30                                |
| PrAg-L1-I210A                      | MMP                  |                                |                  | I210A       | 15                                |
| PrAg-U2-R200A                      | uPA                  | R200A                          |                  |             | 30                                |
| PrAg-L1-K214A                      | MMP                  |                                |                  | K214A       | 15                                |

ND: not done. PrAg-L1: previously characterized MMP-activated PrAg protein with furin site RKKR changed to MMP cleavage sequence GPLGMLSQ. PrAg-U2: previously characterized uPA-activated PrAg protein with furin site RKKR changed to uPA cleavage sequence PGSGRSA.
